# Supplementary material for: A Statewise Analysis of the Socioeconomic and Health Impacts of the COVID-19 Pandemic in India: Lessons for Future Health System Preparedness
Source: Research Square preprint supplement (doi:10.21203/rs.3.rs-6568384/v1), 2025-07-02
Supplement: Supplementary file 1 [file 232e5c30d0b3b89ae6a99db5.docx]

**Table 4: Estimated Years of life lived in disability (YLD), Years of life lost (YLL) and Disability Adjusted Life Years (DALY), India and states.**

| **States** | **YLDS** | | | **YLLS** | | | **DALYS** | | |
| --- | --- | --- | --- | --- | --- | --- | --- | --- | --- |
| **India** | **647** | **536** | **1,182** | **43,39,656** | **23,68,334** | **67,07,990** | **43,36,972** | **23,67,120** | **67,04,092** |
| Andhra Pradesh | 41 | 35 | 76 | 1,11,170 | 60,263 | 1,71,433 | 1,11,211 | 60,297 | 1,71,509 |
| Assam | 11 | 8 | 19 | 73,649 | 32,682 | 1,06,331 | 73,660 | 32,691 | 1,06,350 |
| Bihar | 13 | 8 | 22 | 91,178 | 45,724 | 1,36,903 | 91,192 | 45,733 | 1,36,925 |
| Chhattisgarh | 18 | 14 | 33 | 1,15,803 | 64,462 | 1,80,265 | 1,15,821 | 64,476 | 1,80,297 |
| Delhi | 28 | 23 | 51 | 2,69,929 | 1,50,022 | 4,19,951 | 2,69,957 | 1,50,045 | 4,20,001 |
| Goa | 4 | 3 | 7 | 32,970 | 16,392 | 49,362 | 32,974 | 16,395 | 49,369 |
| Gujarat | 18 | 13 | 31 | 97,725 | 54,374 | 1,52,099 | 97,743 | 54,387 | 1,52,129 |
| Haryana | 17 | 13 | 29 | 96,423 | 54,723 | 1,51,146 | 96,439 | 54,736 | 1,51,175 |
| Himachal Pradesh | 4 | 3 | 7 | 36,574 | 21,952 | 58,525 | 36,578 | 21,955 | 58,532 |
| Jammu and Kashmir | 6 | 4 | 10 | 40,809 | 28,521 | 69,331 | 40,815 | 28,526 | 69,341 |
| Jharkhand | 7 | 5 | 12 | 51,888 | 24,879 | 76,767 | 51,895 | 24,884 | 76,779 |
| Karnataka | 58 | 47 | 105 | 3,27,456 | 1,96,519 | 5,23,976 | 3,27,514 | 1,96,566 | 5,24,081 |
| Kerala | 60 | 57 | 117 | 1,73,258 | 1,39,106 | 3,12,365 | 1,73,319 | 1,39,163 | 3,12,482 |
| Madhya Pradesh | 27 | 26 | 53 | 1,04,101 | 54,203 | 1,58,304 | 1,04,128 | 54,229 | 1,58,357 |
| Maharashtra | 123 | 96 | 219 | 14,17,858 | 7,49,861 | 21,67,720 | 14,17,981 | 7,49,957 | 21,67,938 |
| Odisha | 17 | 13 | 29 | 85,298 | 45,434 | 1,30,733 | 85,315 | 45,447 | 1,30,762 |
| Punjab | 13 | 10 | 23 | 1,77,900 | 79,974 | 2,57,873 | 1,77,913 | 79,983 | 2,57,896 |
| Rajasthan | 19 | 14 | 33 | 85,460 | 49,107 | 1,34,567 | 85,479 | 49,122 | 1,34,601 |
| Telangana | 91 | 87 | 178 | 3,18,821 | 1,71,488 | 4,90,310 | 3,18,912 | 1,71,575 | 4,90,487 |
| Tamil Nadu | 3 | 2 | 5 | 53,744 | 24,608 | 78,352 | 53,747 | 24,610 | 78,357 |
| UP | 35 | 24 | 59 | 2,29,017 | 1,26,736 | 3,55,752 | 2,29,051 | 1,26,760 | 3,55,811 |
| Uttarakhand | 7 | 5 | 12 | 71,649 | 40,244 | 1,11,893 | 71,656 | 40,249 | 1,11,905 |
| West Bengal | 16 | 15 | 31 | 1,75,711 | 89,221 | 2,64,932 | 1,72,397 | 87,486 | 2,59,883 |
| Other NE states | 8 | 7 | 14 | 71,436 | 31,697 | 1,03,134 | 71,444 | 31,704 | 1,03,148 |
| Other UTs | 4 | 4 | 8 | 29828 | 16141 | 45969 | 29832 | 16144 | 45976 |
